# Supplementary material
Source: PubMed Central journal article supplement (PMC8252229)
Supplement: 13059_2021_2395_MOESM1_ESM.pdf [file 13059_2021_2395_MOESM1_ESM.pdf]

**Funding acquisition, Leadership and supervision, Metadata curation, Project administration, Samples and logistics, Sequencing and analysis, Software and analysis tools, and Visualisation:**  
Dr Samuel C Robson PhD <sup>13</sup>.

**Funding acquisition, Leadership and supervision, Metadata curation, Project administration, Samples and logistics, Sequencing and analysis, and Software and analysis tools:**  
Prof Nicholas J Loman PhD <sup>41</sup> and Dr Thomas R Connor PhD <sup>10, 69</sup>.

**Leadership and supervision, Metadata curation, Project administration, Samples and logistics, Sequencing and analysis, Software and analysis tools, and Visualisation:**  
Dr Tanya Golubchik PhD <sup>5</sup>.

**Funding acquisition, Metadata curation, Samples and logistics, Sequencing and analysis, Software and analysis tools, and Visualisation:**  
Dr Rocio T Martinez Nunez PhD <sup>42</sup>.

**Funding acquisition, Leadership and supervision, Metadata curation, Project administration, and Samples and logistics:**  
Dr Catherine Ludden PhD <sup>88</sup>.

**Funding acquisition, Leadership and supervision, Metadata curation, Samples and logistics, and Sequencing and analysis:**  
Dr Sally Corden PhD <sup>69</sup>.

**Funding acquisition, Leadership and supervision, Project administration, Samples and logistics, and Sequencing and analysis:**  
Ian Johnston <sup>99</sup> and Dr David Bonsall PhD <sup>5</sup>.

**Funding acquisition, Leadership and supervision, Sequencing and analysis, Software and analysis tools, and Visualisation:**  
Prof Colin P Smith PhD <sup>87</sup> and Dr Ali R Awan PhD <sup>28</sup>.

**Funding acquisition, Samples and logistics, Sequencing and analysis, Software and analysis tools, and Visualisation:**  
Dr Giselda Bucca PhD <sup>87</sup>.

**Leadership and supervision, Metadata curation, Project administration, Samples and logistics, and Sequencing and analysis:**  
Dr M. Estee Torok FRCP <sup>22, 101</sup>.

**Leadership and supervision, Metadata curation, Project administration, Samples and logistics, and Visualisation:**  
Dr Kordo Saeed MD/ FRCPath <sup>81, 110</sup> and Dr Jacqui A Prieto PhD <sup>83, 109</sup>.

**Leadership and supervision, Metadata curation, Project administration, Sequencing and analysis, and Software and analysis tools:**  
Dr David K Jackson PhD <sup>99</sup>.

**Metadata curation, Project administration, Samples and logistics, Sequencing and analysis, and Software and analysis tools:**  
Dr William L Hamilton PhD <sup>22</sup>.

**Metadata curation, Project administration, Samples and logistics, Sequencing and analysis, and Visualisation:**

Dr Luke B Snell MSc/ MBBS <sup>11</sup>.

**Funding acquisition, Leadership and supervision, Metadata curation, and Samples and logistics:**

Dr Catherine Moore <sup>69</sup>.

**Funding acquisition, Leadership and supervision, Project administration, and Samples and logistics:**

Dr Ewan M Harrison PhD <sup>99, 88</sup>.

**Leadership and supervision, Metadata curation, Project administration, and Samples and logistics:**

Dr Sonia Goncalves PhD <sup>99</sup>.

**Leadership and supervision, Metadata curation, Samples and logistics, and Sequencing and analysis:**

Prof Ian G Goodfellow PhD <sup>24</sup>, Dr Derek J Fairley PhD <sup>3, 72</sup>, Prof Matthew W Loose PhD <sup>18</sup> and Joanne Watkins MSc <sup>69</sup>.

**Leadership and supervision, Metadata curation, Samples and logistics, and Software and analysis tools:**

Rich Livett MSc <sup>99</sup>.

**Leadership and supervision, Metadata curation, Samples and logistics, and Visualisation:**

Dr Samuel Moses MD <sup>25, 106</sup>.

**Leadership and supervision, Metadata curation, Sequencing and analysis, and Software and analysis tools:**

Dr Roberto Amato PhD <sup>99</sup>, Dr Sam Nicholls PhD <sup>41</sup> and Dr Matthew Bull PhD <sup>69</sup>.

**Leadership and supervision, Project administration, Samples and logistics, and Sequencing and analysis:**

Prof Darren L Smith PhD <sup>37, 58, 105</sup>.

**Leadership and supervision, Sequencing and analysis, Software and analysis tools, and Visualisation:**

Dr Jeff Barrett PhD <sup>99</sup> and Prof David M Aanensen PhD <sup>14, 114</sup>.

**Metadata curation, Project administration, Samples and logistics, and Sequencing and analysis:**

Dr Martin D Curran PhD <sup>65</sup>, Dr Surendra Parmar PhD <sup>65</sup>, Dr Dinesh Aggarwal MRCP <sup>95, 99, 64</sup> and Dr James G Shepherd MBChB/MRCP <sup>48</sup>.

**Metadata curation, Project administration, Sequencing and analysis, and Software and analysis tools:**

Dr Matthew D Parker PhD <sup>93</sup>.

**Metadata curation, Samples and logistics, Sequencing and analysis, and Visualisation:**

Dr Sharon Glaysher PhD <sup>61</sup>.

**Metadata curation, Sequencing and analysis, Software and analysis tools, and Visualisation:**

Dr Matthew Bashton PhD<sup>37, 58</sup>, Dr Anthony P Underwood PhD<sup>14, 114</sup>, Dr Nicole Pacchiarini PhD<sup>69</sup> and Dr Katie F Loveson PhD<sup>77</sup>.

**Project administration, Sequencing and analysis, Software and analysis tools, and Visualisation:**

Dr Alessandro M Carabelli PhD<sup>88</sup>.

**Funding acquisition, Leadership and supervision, and Metadata curation:**

Dr Kate E Templeton PhD<sup>53, 90</sup>.

**Funding acquisition, Leadership and supervision, and Project administration:**

Dr Cordelia F Langford PhD<sup>99</sup>, John Sillitoe BEng<sup>99</sup>, Dr Thushan I de Silva PhD<sup>93</sup> and Dr Dennis Wang PhD<sup>93</sup>.

**Funding acquisition, Leadership and supervision, and Sequencing and analysis:**

Prof Dominic Kwiatkowski<sup>99, 107</sup>, Prof Andrew Rambaut DPhil<sup>90</sup>, Dr Justin O'Grady PhD<sup>70, 89</sup> and Dr Simon Cottrell PhD<sup>69</sup>.

**Leadership and supervision, Metadata curation, and Sequencing and analysis:**

Prof Matthew T.G. Holden PhD<sup>68</sup> and Prof Emma C Thomson PhD/FRCPath<sup>48</sup>.

**Leadership and supervision, Project administration, and Samples and logistics:**

Dr Husam Osman PhD<sup>64, 36</sup>, Dr Monique Andersson PhD<sup>59</sup>, Prof Anoop J Chauhan<sup>61</sup> and Dr Mohammed O Hassan-Ibrahim PhD/FRCPath<sup>6</sup>.

**Leadership and supervision, Project administration, and Sequencing and analysis:**

Dr Mara Lawniczak<sup>99</sup>.

**Leadership and supervision, Samples and logistics, and Sequencing and analysis:**

Prof Ravi Kumar Gupta PhD<sup>88, 113</sup>, Dr Alex Alderton PhD<sup>99</sup>, Dr Meera Chand<sup>66</sup>, Dr Chrystala Constantinidou PhD<sup>94</sup>, Dr Meera Unnikrishnan PhD<sup>94</sup>, Prof Alistair C Darby PhD<sup>92</sup>, Prof Julian A Hiscox PhD<sup>92</sup> and Prof Steve Paterson PhD<sup>92</sup>.

**Leadership and supervision, Sequencing and analysis, and Software and analysis tools:**

Dr Inigo Martincorena<sup>99</sup>, Prof David L Robertson PhD<sup>48</sup>, Dr Erik M Volz PhD<sup>39</sup>, Dr Andrew J Page PhD<sup>7</sup> and Prof Oliver G Pybus DPhil<sup>23</sup>.

**Leadership and supervision, Sequencing and analysis, and Visualisation:**

Dr Andrew R Bassett PhD<sup>99</sup>.

**Metadata curation, Project administration, and Samples and logistics:**

Dr Cristina V Ariani PhD<sup>99</sup>, Dr Michael H Spencer Chapman MBBS<sup>99, 88</sup>, Dr Kathy K Li MBChB/FRCPath<sup>48</sup>, Dr Rajiv N Shah BMBS/MRCP/MSc<sup>48</sup>, Dr Natasha G Jesudason MBChB MRCP FRCPath<sup>48</sup> and Dr Yusri Taha MD/PhD<sup>50</sup>.

**Metadata curation, Project administration, and Sequencing and analysis:**

Martin P McHugh MSc<sup>53</sup>, Dr Rebecca Dewar PhD<sup>53</sup>.

**Metadata curation, Samples and logistics, and Sequencing and analysis:**

Dr Aminu S Jahun PhD <sup>24</sup>, Dr Claire McMurray PhD <sup>41</sup>, Ms Sarojini Pandey MSc <sup>84</sup>, Dr James P McKenna PhD <sup>3</sup>, Dr Andrew Nelson PhD <sup>58, 105</sup>, Dr Gregory R Young PhD <sup>37, 58</sup>, Dr Clare M McCann PhD <sup>58, 105</sup> and Mr Scott Elliott <sup>61</sup>.

**Metadata curation, Samples and logistics, and Visualisation:**

Ms Hannah Lowe MSc <sup>25</sup>.

**Metadata curation, Sequencing and analysis, and Software and analysis tools:**

Dr Ben Temperton Ph.D. <sup>91</sup>, Dr Sunando Roy PhD <sup>82</sup>, Dr Anna Price PhD <sup>10</sup>, Dr Sara Rey PhD <sup>69</sup> and Mr Matthew Wyles <sup>93</sup>.

**Metadata curation, Sequencing and analysis, and Visualisation:**

Stefan Rooke MSc <sup>90</sup> and Dr Sharif Shaaban PhD <sup>68</sup>.

**Project administration, Samples and logistics, Sequencing and analysis:**

Dr Mariateresa de Cesare PhD <sup>98</sup>.

**Project administration, Samples and logistics, and Software and analysis tools:**

Laura Letchford BSc <sup>99</sup>.

**Project administration, Samples and logistics, and Visualisation:**

Miss Siona Silveira MSc <sup>81</sup>, Dr Emanuela Pelosi FRCPATH <sup>81</sup> and Dr Eleri Wilson-Davies MD/FRCPATH <sup>81</sup>.

**Samples and logistics, Sequencing and analysis, and Software and analysis tools:**

Dr Myra Hosmillo PhD <sup>24</sup>.

**Sequencing and analysis, Software and analysis tools, and Visualisation:**

Áine O'Toole MSc <sup>90</sup>, Dr Andrew R Hesketh PhD <sup>87</sup>, Mr Richard Stark MSc <sup>94</sup>, Dr Louis du Plessis PhD <sup>23</sup>, Dr Chris Ruis PhD <sup>88</sup>, Dr Helen Adams PhD <sup>4</sup> and Dr Yann Bourgeois PhD <sup>76</sup>.

**Funding acquisition, and Leadership and supervision:**

Dr Stephen L Mitchell PhD <sup>91</sup>, Prof Dimitris Grammatopoulos PhD/FRCPATH <sup>84, 112</sup>, Dr Jonathan Edgeworth PhD/FRCPATH <sup>12</sup>, Prof Judith Breuer MD <sup>30, 82</sup>, Prof John A Todd PhD <sup>98</sup> and Dr Christophe Fraser PhD <sup>5</sup>.

**Funding acquisition, and Project administration:**

Dr David Buck PhD <sup>98</sup> and Michaela John BSc <sup>9</sup>.

**Leadership and supervision, and Metadata curation:**

Dr Gemma L Kay PhD <sup>70</sup>.

**Leadership and supervision, and Project administration:**

Steve Palmer <sup>99</sup>, Prof Sharon J Peacock <sup>88, 64</sup> and David Heyburn <sup>69</sup>.

**Leadership and supervision, and Samples and logistics:**

Danni Weldon BSc <sup>99</sup>, Dr Esther Robinson PhD <sup>64, 36</sup>, Prof Alan McNally PhD <sup>41, 86</sup>, Dr Peter Muir PhD <sup>64</sup>, Dr Ian B Vipond PhD <sup>64</sup>, Dr John BoYes MBChB <sup>29</sup>, Dr Venkat Sivaprakasam PhD <sup>46</sup>, Dr Tranprit Saluja FRCPATH/MD <sup>75</sup>, Dr Samir Dervisevic FRCPATH <sup>54</sup> and Dr Emma J Meader FRCPATH <sup>54</sup>.

**Leadership and supervision, and Sequencing and analysis:**

Dr Naomi R Park PhD<sup>99</sup>, Karen Oliver BSc<sup>99</sup>, Dr Aaron R Jeffries Ph.D.<sup>91</sup>, Dr Sascha Ott PhD<sup>94</sup>, Dr Ana da Silva Filipe PhD<sup>48</sup>, Dr David A Simpson PhD<sup>72</sup> and Dr Chris Williams MB BS<sup>69</sup>.

**Leadership and supervision, and Visualisation:**

Dr Jane AH Masoli MBChB<sup>73, 91</sup>.

**Metadata curation, and Samples and logistics:**

Dr Bridget A Knight PhD.<sup>73, 91</sup>, Dr Christopher R Jones Ph.D.<sup>73, 91</sup>, Mr Cherian Koshy MSc CSci FIBMS<sup>1</sup>, Miss Amy Ash BSc<sup>1</sup>, Dr Anna Casey PhD<sup>71</sup>, Dr Andrew Bosworth PhD<sup>64, 36</sup>, Dr Liz Ratcliffe PhD<sup>71</sup>, Dr Li Xu-McCrae PhD<sup>36</sup>, Miss Hannah M Pymont MSc<sup>64</sup>, Ms Stephanie Hutchings<sup>64</sup>, Dr Lisa Berry PhD<sup>84</sup>, Ms Katie Jones MSc<sup>84</sup>, Dr Fenella Halstead PhD<sup>46</sup>, Mr Thomas Davis MSc<sup>21</sup>, Dr Christopher Holmes PhD<sup>16</sup>, Prof Miren Iturriza-Gomara PhD<sup>92</sup>, Dr Anita O Lucaci PhD<sup>92</sup>, Dr Paul Anthony Randell MBBCh<sup>38, 104</sup>, Dr Alison Cox PhD<sup>38, 104</sup>, Pinglawathee Madona<sup>38, 104</sup>, Dr Kathryn Ann Harris PhD<sup>30</sup>, Dr Julianne Rose Brown PhD<sup>30</sup>, Dr Tabitha W Mahungu FRCPATH<sup>74</sup>, Dr Dianne Irish-Tavares FRCPATH<sup>74</sup>, Dr Tanzina Haque FRCPATH PhD<sup>74</sup>, Dr Jennifer Hart MRCP<sup>74</sup>, Mr Eric Witele MSc<sup>74</sup>, Mrs Melisa Louise Fenton DipHE<sup>75</sup>, Mr Steven Liggett<sup>79</sup>, Dr Clive Graham MD<sup>56</sup>, Ms Emma Swindells BSc<sup>57</sup>, Ms Jennifer Collins BSc<sup>50</sup>, Mr Gary Eltringham BSc<sup>50</sup>, Ms Sharon Campbell MSc<sup>17</sup>, Dr Patrick C McClure PhD<sup>97</sup>, Dr Gemma Clark PhD<sup>15</sup>, Dr Tim J Sloan PhD<sup>60</sup>, Mr Carl Jones<sup>15</sup> and Dr Jessica Lynch PhD MBChB<sup>2, 111</sup>.

**Metadata curation, and Sequencing and analysis:**

Dr Ben Warne MRCP<sup>8</sup>, Steven Leonard PhD<sup>99</sup>, Jillian Durham BSc<sup>99</sup>, Dr Thomas Williams MD<sup>90</sup>, Dr Sam T Haldenby PhD<sup>92</sup>, Dr Nathaniel Storey PhD<sup>30</sup>, Dr Nabil-Fareed Alikhan PhD<sup>70</sup>, Dr Nadine Holmes PhD<sup>18</sup>, Dr Christopher Moore PhD<sup>18</sup>, Mr Matthew Carlile BSc<sup>18</sup>, Malorie Perry MSc<sup>69</sup>, Dr Noel Craine DPhil<sup>69</sup>, Prof Ronan A Lyons MD<sup>80</sup>, Miss Angela H Beckett MSc<sup>13</sup>, Salman Goudarzi PhD<sup>77</sup>, Christopher Fearn MRes<sup>77</sup>, Kate Cook<sup>77</sup>, Hannah Dent BSc<sup>77</sup> and Hannah Paul MRes<sup>77</sup>.

**Metadata curation, and Software and analysis tools:**

Robert Davies<sup>99</sup>.

**Project administration, and Samples and logistics:**

Beth Blane BSc<sup>88</sup>, Sophia T Girgis MSc<sup>88</sup>, Dr Mathew A Beale PhD<sup>99</sup>, Katherine L Bellis<sup>99, 88</sup>, Matthew J Dorman<sup>99</sup>, Eleanor Drury<sup>99</sup>, Leanne Kane<sup>99</sup>, Sally Kay<sup>99</sup>, Dr Samantha McGuigan<sup>99</sup>, Dr Rachel Nelson PhD<sup>99</sup>, Liam Prestwood<sup>99</sup>, Dr Shavanthi Rajatileka PhD<sup>99</sup>, Dr Rahul Batra MD<sup>12</sup>, Dr Rachel J Williams PhD<sup>82</sup>, Dr Mark Kristiansen PhD<sup>82</sup>, Dr Angie Green PhD<sup>98</sup>, Miss Anita Justice MSc<sup>59</sup>, Dr Adhyana I.K Mahanama MD<sup>81, 102</sup> and Dr Buddhini Samaraweera MD<sup>81, 102</sup>.

**Project administration, and Sequencing and analysis:**

Dr Nazreen F Hadjirin PhD<sup>88</sup> and Dr Joshua Quick PhD<sup>41</sup>.

**Project administration, and Software and analysis tools:**

Mr Radoslaw Poplawski BSc<sup>41</sup>.

**Samples and logistics, and Sequencing and analysis:**

Leanne M Kermack MSc<sup>88</sup>, Nicola Reynolds PhD<sup>7</sup>, Grant Hall BS<sup>24</sup>, Yasmin Chaudhry BSc<sup>24</sup>, Malte L Pinckert MPhil<sup>24</sup>, Dr Iliana Georgana PhD<sup>24</sup>, Dr Robin J Moll PhD<sup>99</sup>, Dr Alicia Thornton<sup>66</sup>, Dr Richard Myers<sup>66</sup>, Dr Joanne Stockton PhD<sup>41</sup>, Miss Charlotte A Williams BSc<sup>82</sup>, Dr Wen C Yew PhD<sup>58</sup>, Alexander J Trotter MRes<sup>70</sup>, Miss Amy Trebes MSc<sup>98</sup>, Mr George MacIntyre-Cockett BSc<sup>98</sup>, Alec Birchley MSc<sup>69</sup>, Alexander Adams BSc<sup>69</sup>, Amy Plimmer<sup>69</sup>, Bree Gatica-Wilcox MPhil<sup>69</sup>, Dr Caoimhe McKerr PhD<sup>69</sup>, Ember Hilvers MA<sup>69</sup>, Hannah Jones<sup>69</sup>, Dr Hibo Asad PhD<sup>69</sup>, Jason Coombes BSc<sup>69</sup>, Johnathan M Evans MSc<sup>69</sup>, Laia Fina<sup>69</sup>, Lauren Gilbert A-Levels<sup>69</sup>, Lee Graham BSc<sup>69</sup>, Michelle

Cronin <sup>69</sup>, Sara Kumziene-SummerhaYes MSc <sup>69</sup>, Sarah Taylor <sup>69</sup>, Sophie Jones MSc <sup>69</sup>, Miss Danielle C Groves BA <sup>93</sup>, Mrs Peijun Zhang MSc <sup>93</sup>, Miss Marta Gallis MSc <sup>93</sup> and Miss Stavroula F Louka MSc <sup>93</sup>.

#### **Samples and logistics, and Software and analysis tools:**

Dr Igor Starinskij Msc MRCP <sup>48</sup>.

#### **Sequencing and analysis, and Software and analysis tools:**

Dr Chris J Illingworth PhD <sup>47</sup>, Dr Chris Jackson PhD <sup>47</sup>, Ms Marina Gourtovaia MSc <sup>99</sup>, Gerry Tonkin-Hill <sup>99</sup>, Kevin Lewis <sup>99</sup>, Dr Jaime M Tovar-Corona PhD <sup>99</sup>, Dr Keith James PhD <sup>99</sup>, Dr Laura Baxter PhD <sup>94</sup>, Dr Mohammad T. Alam PhD <sup>94</sup>, Dr Richard J Orton PhD <sup>48</sup>, Dr Joseph Hughes PhD <sup>48</sup>, Dr Sreenu Vattipally PhD <sup>48</sup>, Dr Manon Ragonnet-Cronin PhD <sup>39</sup>, Dr Fabricia F. Nascimento PhD <sup>39</sup>, Mr David Jorgensen MSc <sup>39</sup>, Ms Olivia Boyd MSc <sup>39</sup>, Ms Lily Geidelberg MSc <sup>39</sup>, Dr Alex E Zarebski PhD <sup>23</sup>, Dr Jayna Raghvani PhD <sup>23</sup>, Dr Moritz UG Kraemer DPhil <sup>23</sup>, Joel Southgate MSc <sup>10, 69</sup>, Dr Benjamin B Lindsey MRCP <sup>93</sup> and Mr Timothy M Freeman MPhil <sup>93</sup>.

#### **Software and analysis tools, and Visualisation:**

Jon-Paul Keatley <sup>99</sup>, Dr Joshua B Singer PhD <sup>48</sup>, Leonardo de Oliveira Martins PhD <sup>70</sup>, Dr Corin A Yeats PhD <sup>14</sup>, Dr Khalil Abudahab PhD <sup>14, 114</sup>, Mr Ben EW Taylor MEng <sup>14, 114</sup> and Mirko Menegazzo <sup>14</sup>.

#### **Leadership and supervision:**

Prof John Danesh <sup>99</sup>, Wendy Hogsden MSc <sup>46</sup>, Dr Sahar Eldirdiri MBBS MSc FRCPATH <sup>21</sup>, Mrs Anita Kenyon MSc <sup>21</sup>, Dr Jenifer Mason MBBS <sup>43</sup>, Mr Trevor I Robinson MSc <sup>43</sup>, Prof Alison Holmes MD <sup>38, 103</sup>, Dr James Price PhD <sup>38, 103</sup>, Prof John A Hartley PhD <sup>82</sup>, Dr Tanya Curran PhD <sup>3</sup>, Dr Alison E Mather PhD <sup>70</sup>, Dr Giri Shankar <sup>69</sup>, Dr Rachel Jones <sup>69</sup>, Dr Robin Howe <sup>69</sup> and Dr Sian Morgan FRCPATH <sup>9</sup>.

#### **Metadata curation:**

Dr Elizabeth Wastenge MD <sup>53</sup>, Dr Michael R Chapman PhD <sup>34, 88, 99</sup>, Mr Siddharth Mookerjee MPH <sup>38, 103</sup>, Dr Rachael Stanley PhD <sup>54</sup>, Mrs Wendy Smith <sup>15</sup>, Prof Timothy Peto PhD <sup>59</sup>, Dr David Eyre PhD <sup>59</sup>, Dr Derrick Crook <sup>59</sup>, Dr Gabrielle Vernet MBBS <sup>33</sup>, Dr Christine Kitchen PhD <sup>10</sup>, Huw Gulliver <sup>10</sup>, Dr Ian Merrick PhD <sup>10</sup>, Prof Martyn Guest PhD <sup>10</sup>, Robert Munn BSc <sup>10</sup>, Dr Declan T Bradley <sup>63, 72</sup> and Dr Tim Wyatt <sup>63</sup>.

#### **Project administration:**

Dr Charlotte Beaver <sup>99</sup>, Luke Foulser <sup>99</sup>, Sophie Palmer <sup>88</sup>, Carol M Churcher <sup>88</sup>, Ellena Brooks MA <sup>88</sup>, Kim S Smith <sup>88</sup>, Dr Katerina Galai PhD <sup>88</sup>, Georgina M McManus BSc <sup>88</sup>, Dr Frances Bolt PhD <sup>38, 103</sup>, Dr Francesc Coll PhD <sup>19</sup>, Lizzie Meadows MA <sup>70</sup>, Dr Stephen W Attwood PhD <sup>23</sup>, Dr Alisha Davies <sup>69</sup>, Elen De Lacy MSc <sup>69</sup>, Fatima Downing <sup>69</sup>, Sue Edwards <sup>69</sup>, Dr Garry P Scarlett PhD <sup>76</sup>, Mrs Sarah Jeremiah MSc <sup>83</sup> and Dr Nikki Smith PhD <sup>93</sup>.

#### **Samples and logistics:**

Danielle Leek Bsc <sup>88</sup>, Sushmita Sridhar BS <sup>88, 99</sup>, Sally Forrest BSc <sup>88</sup>, Claire Cormie <sup>88</sup>, Harmeet K Gill PhD <sup>88</sup>, Joana Dias MSc <sup>88</sup>, Ellen E Higginson PhD <sup>88</sup>, Mailis Maes MPhil <sup>88</sup>, Jamie Young BSc <sup>88</sup>, Michelle Wantoch PhD <sup>7</sup>, Sanger Covid Team ([www.sanger.ac.uk/covid-team](http://www.sanger.ac.uk/covid-team)) <sup>99</sup>, Dorota Jamrozny <sup>99</sup>, Stephanie Lo <sup>99</sup>, Dr Minal Patel PhD <sup>99</sup>, Verity Hill <sup>90</sup>, Ms Claire M Bewshea MSc <sup>91</sup>, Prof Sian Ellard FRCPATH <sup>73, 91</sup>, Dr Cressida Auckland FRCPATH <sup>73</sup>, Dr Ian Harrison <sup>66</sup>, Dr Chloe Bishop <sup>66</sup>, Dr Vicki Chalker <sup>66</sup>, Dr Alex Richter PhD <sup>85</sup>, Dr Andrew Beggs PhD <sup>85</sup>, Dr Angus Best PhD <sup>86</sup>, Dr Benita Percival PhD <sup>86</sup>, Dr Jeremy Mirza PhD <sup>86</sup>, Dr Oliver Megram PhD <sup>86</sup>, Dr Megan Mayhew PhD <sup>86</sup>, Dr Liam Crawford PhD <sup>86</sup>, Dr Fiona Ashcroft PhD <sup>86</sup>, Dr Emma Moles-Garcia PhD <sup>86</sup>, Dr Nicola Cumley PhD <sup>86</sup>, Mr Richard Hopes <sup>64</sup>, Dr Patawee Asamaphan PhD <sup>48</sup>, Mr Marc O Niebel MSc <sup>48</sup>, Prof Rory N Gunson PhD FRCPATH <sup>100</sup>, Dr Amanda Bradley PhD <sup>52</sup>, Dr Alasdair Maclean PhD <sup>52</sup>, Dr Guy Mollett MBChB <sup>52</sup>, Dr Rachel Blacow MBChB <sup>52</sup>, Mr Paul Bird MSc <sup>16</sup>, Mr Thomas Helmer <sup>16</sup>, Miss Karlie Fallon <sup>16</sup>, Dr Julian Tang <sup>16</sup>, Dr

Antony D Hale MBBS<sup>49</sup>, Dr Louissa R Macfarlane-Smith PhD<sup>49</sup>, Katherine L Harper MBiol<sup>49</sup>, Miss Holli Carden MSc<sup>49</sup>, Dr Nicholas W Machin MSc<sup>45, 64</sup>, Ms Kathryn A Jackson MSc<sup>92</sup>, Dr Shazaad S Y Ahmad MSc<sup>45, 64</sup>, Dr Ryan P George PhD<sup>45</sup>, Dr Lance Turtle PhD MRCP<sup>92</sup>, Mrs Elaine O'Toole BSc<sup>43</sup>, Mrs Joanne Watts BSc<sup>43</sup>, Mrs Cassie Breen BSc<sup>43</sup>, Mrs Angela Cowell MSc<sup>43</sup>, Ms Adela Alcolea-Medina<sup>32, 96</sup>, Ms Themoula Charalampous MSc<sup>12, 42</sup>, Amita Patel<sup>11</sup>, Dr Lisa J Levett PhD<sup>35</sup>, Dr Judith Heaney PhD<sup>35</sup>, Dr Aileen Rowan PhD<sup>39</sup>, Prof Graham P Taylor DSc<sup>39</sup>, Dr Divya Shah PhD<sup>30</sup>, Miss Laura Atkinson MSc<sup>30</sup>, Mr Jack CD Lee MSc<sup>30</sup>, Mr Adam P Westhorpe BSc<sup>82</sup>, Dr Riaz Jannoo PhD<sup>82</sup>, Dr Helen L Lowe PhD<sup>82</sup>, Miss Angeliki Karamani MSc<sup>82</sup>, Miss Leah Ensell BSc<sup>82</sup>, Mrs Wendy Chatterton MSc<sup>35</sup>, Miss Monika Pusok MSc<sup>35</sup>, Mrs Ashok Dadrah MSc<sup>75</sup>, Miss Amanda Symmonds MSc<sup>75</sup>, Dr Graciela Sluga MD/MSc<sup>44</sup>, Dr Zoltan Molnar PhD<sup>72</sup>, Mr Paul Baker MD<sup>79</sup>, Prof Stephen Bonner<sup>79</sup>, Ms Sarah Essex<sup>79</sup>, Dr Edward Barton MD<sup>56</sup>, Ms Debra Padgett BSc<sup>56</sup>, Ms Garren Scott BSc<sup>56</sup>, Ms Jane Greenaway MSc<sup>57</sup>, Dr Brendan Al Payne MD<sup>50</sup>, Dr Shirelle Burton-Fanning MD<sup>50</sup>, Dr Sheila Waugh MD<sup>50</sup>, Dr Veena Raviprakash MD<sup>17</sup>, Ms Nicola Sheriff BSc<sup>17</sup>, Ms Victoria Blakey BSc<sup>17</sup>, Ms Lesley-Anne Williams BSc<sup>17</sup>, Dr Jonathan Moore MD<sup>27</sup>, Ms Susanne Stonehouse BSc<sup>27</sup>, Dr Louise Smith<sup>55</sup>, Dr Rose K Davidson PhD<sup>89</sup>, Dr Luke Bedford<sup>26</sup>, Dr Lindsay Coupland PhD<sup>54</sup>, Ms Victoria Wright BSc<sup>18</sup>, Dr Joseph G Chappell PhD<sup>97</sup>, Dr Theocharis Tsoleridis PhD<sup>97</sup>, Prof Jonathan Ball PhD<sup>97</sup>, Mrs Manjinder Khakh<sup>15</sup>, Dr Vicki M Fleming PhD<sup>15</sup>, Dr Michelle M Lister PhD<sup>15</sup>, Dr Hannah C Howson-Wells PhD<sup>15</sup>, Dr Louise Berry<sup>15</sup>, Dr Tim Boswell<sup>15</sup>, Dr Amelia Joseph<sup>15</sup>, Dr Iona Willingham<sup>15</sup>, Dr Nichola Duckworth<sup>60</sup>, Dr Sarah Walsh<sup>60</sup>, Dr Emma Wise PhD<sup>2, 111</sup>, Dr Nathan Moore PhD<sup>2, 111</sup>, Miss Matilde Mori BSc<sup>2, 108, 111</sup>, Dr Nick Cortes MRCP FRCPath<sup>2, 111</sup>, Dr Stephen Kidd PhD<sup>2, 111</sup>, Dr Rebecca Williams BMBS<sup>33</sup>, Laura Gifford MSc<sup>69</sup>, Miss Kelly Bicknell<sup>61</sup>, Dr Sarah Wyllie<sup>61</sup>, Miss Allyson Lloyd<sup>61</sup>, Mr Robert Impey MSc<sup>61</sup>, Ms Cassandra S Malone MSc<sup>6</sup>, Mr Benjamin J Cogger BSc<sup>6</sup>, Nick Levene MSc<sup>62</sup>, Lynn Monaghan<sup>62</sup>, Dr Alexander J Keeley MRCP<sup>93</sup>, Dr David G Partridge FRCP FRCPath<sup>78, 93</sup>, Dr Mohammad Raza<sup>78, 93</sup>, Dr Cariad Evans<sup>78, 93</sup> and Dr Kate Johnson<sup>78, 93</sup>.

### Sequencing and analysis:

Emma Betteridge BSc<sup>99</sup>, Ben W Farr BSc<sup>99</sup>, Scott Goodwin MSc<sup>99</sup>, Dr Michael A Quail PhD<sup>99</sup>, Carol Scott<sup>99</sup>, Lesley Shirley MSc<sup>99</sup>, Scott AJ Thurston BSc<sup>99</sup>, Diana Rajan MSc<sup>99</sup>, Dr Iraad F Bronner PhD<sup>99</sup>, Louise Aigrain PhD<sup>99</sup>, Dr Nicholas M Redshaw PhD<sup>99</sup>, Dr Stefanie V Lensing PhD<sup>99</sup>, Shane McCarthy<sup>99</sup>, Alex Makunin<sup>99</sup>, Dr Carlos E Balcazar PhD<sup>90</sup>, Dr Michael D Gallagher PhD<sup>90</sup>, Dr Kathleen A Williamson PhD<sup>90</sup>, Thomas D Stanton BSc<sup>90</sup>, Ms Michelle L Michelsen BSc<sup>91</sup>, Ms Joanna Warwick-Dugdale BSc<sup>91</sup>, Dr Robin Manley Ph.D.<sup>91</sup>, Ms Audrey Farbos MSc<sup>91</sup>, Dr James W Harrison Ph.D.<sup>91</sup>, Dr Christine M Sambles Ph.D.<sup>91</sup>, Dr David J Studholme Ph.D.<sup>91</sup>, Dr Angie Lackenby<sup>66</sup>, Dr Tamyo Mbisa<sup>66</sup>, Dr Steven Platt<sup>66</sup>, Mr Shahjahan Miah<sup>66</sup>, Dr David Bibby<sup>66</sup>, Dr Carmen Manso<sup>66</sup>, Dr Jonathan Hubb<sup>66</sup>, Dr Gavin Dabrera<sup>66</sup>, Dr Mary Ramsay<sup>66</sup>, Dr Daniel Bradshaw<sup>66</sup>, Dr Ulf Schaefer<sup>66</sup>, Dr Natalie Groves<sup>66</sup>, Dr Eileen Gallagher<sup>66</sup>, Dr David Lee<sup>66</sup>, Dr David Williams<sup>66</sup>, Dr Nicholas Ellaby<sup>66</sup>, Hassan Hartman<sup>66</sup>, Nikos Manesis<sup>66</sup>, Vineet Patel<sup>66</sup>, Juan Ledesma<sup>67</sup>, Ms Katherine A Twohig<sup>67</sup>, Dr Elias Allara<sup>64, 88</sup>, Ms Clare Pearson<sup>64, 88</sup>, Mr Jeffrey K. J. Cheng MSc<sup>94</sup>, Dr Hannah E. Bridgewater PhD<sup>94</sup>, Ms Lucy R. Frost BSc<sup>94</sup>, Ms Grace Taylor-Joyce BSc<sup>94</sup>, Dr Paul E Brown PhD<sup>94</sup>, Dr Lily Tong PhD<sup>48</sup>, Ms Alice Broos BSc<sup>48</sup>, Mr Daniel Mair BSc<sup>48</sup>, Mrs Jenna Nichols BSc<sup>48</sup>, Dr Stephen N Carmichael PhD<sup>48</sup>, Dr Katherine L Smollett PhD<sup>40</sup>, Dr Kyriaki Nomikou PhD<sup>48</sup>, Dr Elihu Aranday-Cortes PhD/DVM<sup>48</sup>, Ms Natasha Johnson BSc<sup>48</sup>, Dr Seema Nickbakhsh PhD<sup>48, 68</sup>, Dr Edith E Vamos PhD<sup>92</sup>, Dr Margaret Hughes PhD<sup>92</sup>, Dr Lucille Rainbow PhD<sup>92</sup>, Mr Richard Eccles MSc<sup>92</sup>, Ms Charlotte Nelson MSc<sup>92</sup>, Dr Mark Whitehead PhD<sup>92</sup>, Dr Richard Gregory PhD<sup>92</sup>, Mr Matthew Gemmell MSc<sup>92</sup>, Ms Claudia Wierzbicki BSc<sup>92</sup>, Ms Hermione J Webster BSc<sup>92</sup>, Ms Chloe L Fisher MSc<sup>28</sup>, Mr Adrian W Signell BSc<sup>20</sup>, Dr Gilberto Betancor PhD<sup>20</sup>, Mr Harry D Wilson BSc<sup>20</sup>, Dr Gaia Nebbia PhD FRCPath<sup>12</sup>, Dr Flavia Flaviani PhD<sup>31</sup>, Mr Alberto C Cerda MSc<sup>96</sup>, Ms Tammy V Merrill MSc<sup>96</sup>, Rebekah E Wilson MSc<sup>96</sup>, Mr Marius Cotic MSc<sup>82</sup>, Miss Nadua Bayzid BSc<sup>82</sup>, Dr Thomas Thompson PhD<sup>72</sup>, Dr Erwan Acheson PhD<sup>72</sup>, Prof Steven Rushton PhD<sup>51</sup>, Prof Sarah O'Brien PhD<sup>51</sup>, David J Baker BEng<sup>70</sup>, Steven Rudder<sup>70</sup>, Alp Aydin MSci<sup>70</sup>, Dr Fei Sang PhD<sup>18</sup>, Dr Johnny Debebe PhD<sup>18</sup>, Dr Sarah Francois PhD<sup>23</sup>, Dr Tetyana I Vasylyeva DPhil<sup>23</sup>, Dr Marina Escalera Zamudio PhD<sup>23</sup>, Mr Bernardo Gutierrez MSc<sup>23</sup>, Dr Angela

Marchbank BSc <sup>10</sup>, Joshua Maksimovic FD <sup>9</sup>, Karla Spellman FD <sup>9</sup>, Kathryn McCluggage MSc <sup>9</sup>, Dr Mari Morgan PhD <sup>69</sup>, Robert Beer BSc <sup>9</sup>, Safiah Afifi BSc <sup>9</sup>, Trudy Workman HNC <sup>10</sup>, William Fuller BSc <sup>10</sup>, Catherine Bresner BSc <sup>10</sup>, Dr Adrienn Angyal PhD <sup>93</sup>, Dr Luke R Green PhD <sup>93</sup>, Dr Paul J Parsons PhD <sup>93</sup>, Miss Rachel M Tucker MSc <sup>93</sup>, Dr Rebecca Brown PhD <sup>93</sup> and Mr Max Whiteley PhD <sup>93</sup>

#### **Software and analysis tools:**

James Bonfield BSc <sup>99</sup>, Dr Christoph Puethe <sup>99</sup>, Mr Andrew Whitwham BSc <sup>99</sup>, Jennifer Liddle <sup>99</sup>, Dr Will Rowe PhD <sup>41</sup>, Dr Igor Siveroni PhD <sup>39</sup>, Dr Thanh Le-Viet PhD <sup>70</sup> and Amy Gaskin MSc <sup>69</sup>.

#### **Visualisation:**

Dr Rob Johnson PhD <sup>39</sup>.

**1** Barking, Havering and Redbridge University Hospitals NHS Trust, **2** Basingstoke Hospital, **3** Belfast Health & Social Care Trust, **4** Betsi Cadwaladr University Health Board, **5** Big Data Institute, Nuffield Department of Medicine, University of Oxford, **6** Brighton and Sussex University Hospitals NHS Trust, **7** Cambridge Stem Cell Institute, University of Cambridge, **8** Cambridge University Hospitals NHS Foundation Trust, **9** Cardiff and Vale University Health Board, **10** Cardiff University, **11** Centre for Clinical Infection & Diagnostics Research, St. Thomas' Hospital and Kings College London, **12** Centre for Clinical Infection and Diagnostics Research, Department of Infectious Diseases, Guy's and St Thomas' NHS Foundation Trust, **13** Centre for Enzyme Innovation, University of Portsmouth (PORT), **14** Centre for Genomic Pathogen Surveillance, University of Oxford, **15** Clinical Microbiology Department, Queens Medical Centre, **16** Clinical Microbiology, University Hospitals of Leicester NHS Trust, **17** County Durham and Darlington NHS Foundation Trust, **18** Deep Seq, School of Life Sciences, Queens Medical Centre, University of Nottingham, **19** Department of Infection Biology, Faculty of Infectious & Tropical Diseases, London School of Hygiene & Tropical Medicine, **20** Department of Infectious Diseases, King's College London, **21** Department of Microbiology, Kettering General Hospital, **22** Departments of Infectious Diseases and Microbiology, Cambridge University Hospitals NHS Foundation Trust; Cambridge, UK, **23** Department of Zoology, University of Oxford, **24** Division of Virology, Department of Pathology, University of Cambridge, **25** East Kent Hospitals University NHS Foundation Trust, **26** East Suffolk and North Essex NHS Foundation Trust, **27** Gateshead Health NHS Foundation Trust, **28** Genomics Innovation Unit, Guy's and St. Thomas' NHS Foundation Trust, **29** Gloucestershire Hospitals NHS Foundation Trust, **30** Great Ormond Street Hospital for Children NHS Foundation Trust, **31** Guy's and St. Thomas' BRC, **32** Guy's and St. Thomas' Hospitals, **33** Hampshire Hospitals NHS Foundation Trust, **34** Health Data Research UK Cambridge, **35** Health Services Laboratories, **36** Heartlands Hospital, Birmingham, **37** Hub for Biotechnology in the Built Environment, Northumbria University, **38** Imperial College Hospitals NHS Trust, **39** Imperial College London, **40** Institute of Biodiversity, Animal Health & Comparative Medicine, **41** Institute of Microbiology and Infection, University of Birmingham, **42** King's College London, **43** Liverpool Clinical Laboratories, **44** Maidstone and Tunbridge Wells NHS Trust, **45** Manchester University NHS Foundation Trust, **46** Microbiology Department, Wye Valley NHS Trust, Hereford, **47** MRC Biostatistics Unit, University of Cambridge, **48** MRC-University of Glasgow Centre for Virus Research, **49** National Infection Service, PHE and Leeds Teaching Hospitals Trust, **50** Newcastle Hospitals NHS Foundation Trust, **51** Newcastle University, **52** NHS Greater Glasgow and Clyde, **53** NHS Lothian, **54** Norfolk and Norwich University Hospital, **55** Norfolk County Council, **56** North Cumbria Integrated Care NHS Foundation Trust, **57** North Tees and Hartlepool NHS Foundation Trust, **58** Northumbria University, **59** Oxford University Hospitals NHS Foundation Trust, **60** PathLinks, Northern Lincolnshire & Goole NHS Foundation Trust, **61** Portsmouth Hospitals University NHS Trust, **62** Princess Alexandra Hospital Microbiology Dept., **63** Public Health Agency, **64** Public Health England, **65** Public Health England, Clinical Microbiology and Public Health Laboratory, Cambridge, UK, **66** Public Health England, Colindale, **67** Public Health England, Colindale, **68** Public Health Scotland, **69** Public Health Wales NHS Trust, **70** Quadram Institute Bioscience, **71** Queen Elizabeth Hospital, **72** Queen's University Belfast, **73** Royal Devon and Exeter NHS Foundation Trust, **74** Royal Free NHS Trust, **75** Sandwell and West Birmingham NHS Trust, **76** School of Biological Sciences, University of Portsmouth (PORT), **77** School of Pharmacy and Biomedical Sciences, University of Portsmouth (PORT), **78** Sheffield Teaching Hospitals, **79** South Tees Hospitals NHS Foundation Trust, **80** Swansea University, **81** University Hospitals Southampton NHS Foundation Trust, **82** University College London, **83** University Hospital Southampton NHS Foundation Trust, **84** University Hospitals Coventry and Warwickshire, **85** University of Birmingham, **86** University of Birmingham Turnkey Laboratory, **87** University of Brighton, **88** University of Cambridge, **89** University of East Anglia, **90** University of Edinburgh, **91**



University of Exeter, **92** University of Liverpool, **93** University of Sheffield, **94** University of Warwick, **95** University of Cambridge, **96** Viapath, Guy's and St Thomas' NHS Foundation Trust, and King's College Hospital NHS Foundation Trust, **97** Virology, School of Life Sciences, Queens Medical Centre, University of Nottingham, **98** Wellcome Centre for Human Genetics, Nuffield Department of Medicine, University of Oxford, **99** Wellcome Sanger Institute, **100** West of Scotland Specialist Virology Centre, NHS Greater Glasgow and Clyde, **101** Department of Medicine, University of Cambridge, **102** Ministry of Health, Sri Lanka, **103** NIHR Health Protection Research Unit in HCAI and AMR, Imperial College London, **104** North West London Pathology, **105** NU-OMICS, Northumbria University, **106** University of Kent, **107** University of Oxford, **108** University of Southampton, **109** University of Southampton School of Health Sciences, **110** University of Southampton School of Medicine, **111** University of Surrey, **112** Warwick Medical School and Institute of Precision Diagnostics, Pathology, UHCW NHS Trust, **113** Wellcome Africa Health Research Institute Durban and **114** Wellcome Genome Campus.
